# Supplementary material for: Modulating surficial oxygen vacancy of the VO2 nanostructure to boost its electromagnetic absorption performance
Source: Royal Society of Chemistry journal article supplement (doi:10.1039/d1tc02136b), 2021-01-01
Supplement: d1tc02136b1.pdf [file d1tc02136b1.pdf]

## Supplementary data

### Modulating Surficial Oxygen Vacancy of VO<sub>2</sub> Nanostructure to Boost Its Electromagnetic Absorption Performance

Siyao Cheng,<sup>a,b</sup> Aming Xie,<sup>a,\*</sup> Xihao Pan,<sup>b</sup> Kexin Zhang,<sup>a</sup> Cheng Zhang,<sup>b</sup> Xiangpeng Lin,<sup>b</sup> and Wei Dong<sup>b</sup>

<sup>a</sup> School of Mechanical Engineering, Nanjing University of Science and Technology, Nanjing 210094, China

<sup>b</sup> School of Chemical Engineering, Nanjing University of Science and Technology, Nanjing 210094, China

\* Corresponding author: xieaming@njust.edu.cn (A. Xie)

#### 1. Experimental section

**Preparation of MoO<sub>3</sub>-B<sub>0.5</sub>:** Prepare commercial MoO<sub>3</sub> (1 g) and NaBH<sub>4</sub> (0.5 g) to a mortar, and then grinding the solid mixture using pestle for 20 min until it turns black. Instantaneously, transfer the solids mixture from the mortar into a beaker of cold water. Then stirring for 1 h until no bubbles appear in the solution, indicating that excess NaBH<sub>4</sub> has been removed. The final precipitations are collected by vacuum filtration and wash with methanol and distilled water twice times, and then dry in a vacuum at 60°C for 12 h.

## 2. Supported table

**Table S1.** The area of the corresponding individual component is fitted by the peak for VO<sub>2</sub> and VO<sub>2</sub>-B<sub>x</sub> (x = 0.05, 0.3, 1.0).

|                                    | V4+<br>2p3/2 | V5+ 2p3/2 | V4+<br>2p1/2 | V5+<br>2p1/2 | O1s      | OH       |
|------------------------------------|--------------|-----------|--------------|--------------|----------|----------|
| VO <sub>2</sub>                    | 11900.622    | 13599.736 | 6637.54      | 6095.68      | 23375.79 | 7553.521 |
| VO <sub>2</sub> -B <sub>0.05</sub> | 14186.112    | 10787.608 | 5093.46      | 5164.53      | 15501.81 | 5001.279 |
| VO <sub>2</sub> -B <sub>0.3</sub>  | 11565.824    | 8233.9145 | 4206.58      | 4330.59      | 27722.54 | 1130.806 |
| VO <sub>2</sub> -B <sub>1.0</sub>  | 17272.307    | 8752.8466 | 5591.05      | 4052.53      | 31404.20 | 0.09615  |

## 3. Supported Fig.s

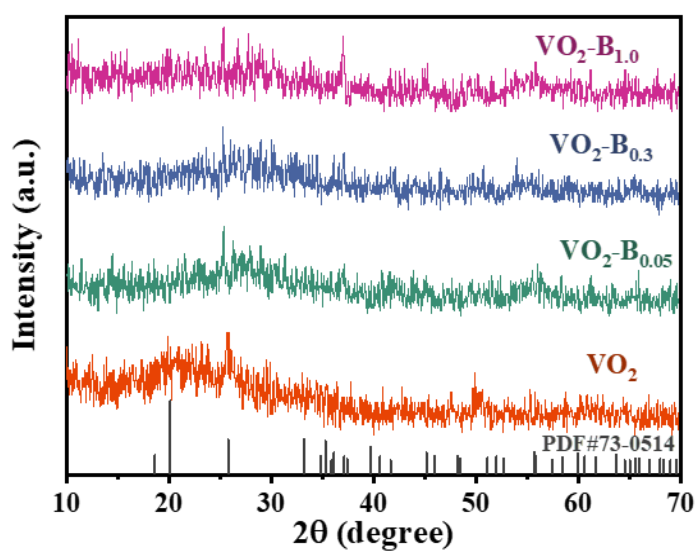

**Fig. S1.** XRD pattern of VO<sub>2</sub> and VO<sub>2</sub>-B<sub>x</sub> (x = 0.05, 0.3, 1.0).

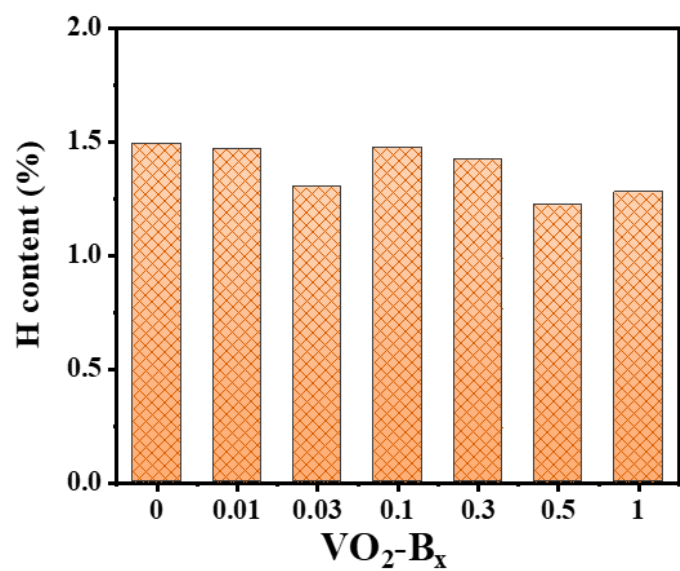

**Fig. S2.** H content of  $\text{VO}_2$  and  $\text{VO}_2\text{-B}_x$  ( $x = 0.01, 0.03, 0.1, 0.3, 0.5, 1.0$ ).

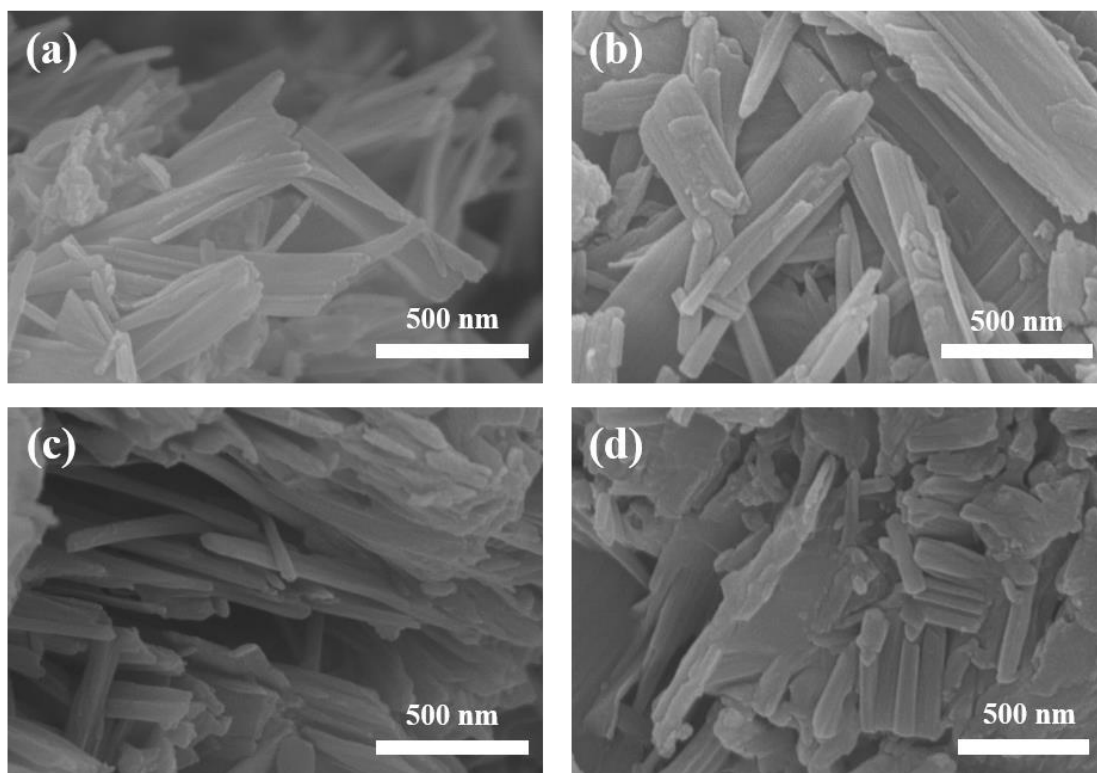

**Fig. S3.** SEM images of (a)  $\text{VO}_2\text{-B}_{0.05}$ , (b)  $\text{VO}_2\text{-B}_{0.1}$ , (c)  $\text{VO}_2\text{-B}_{0.3}$ , (d)  $\text{VO}_2\text{-B}_{1.0}$ .

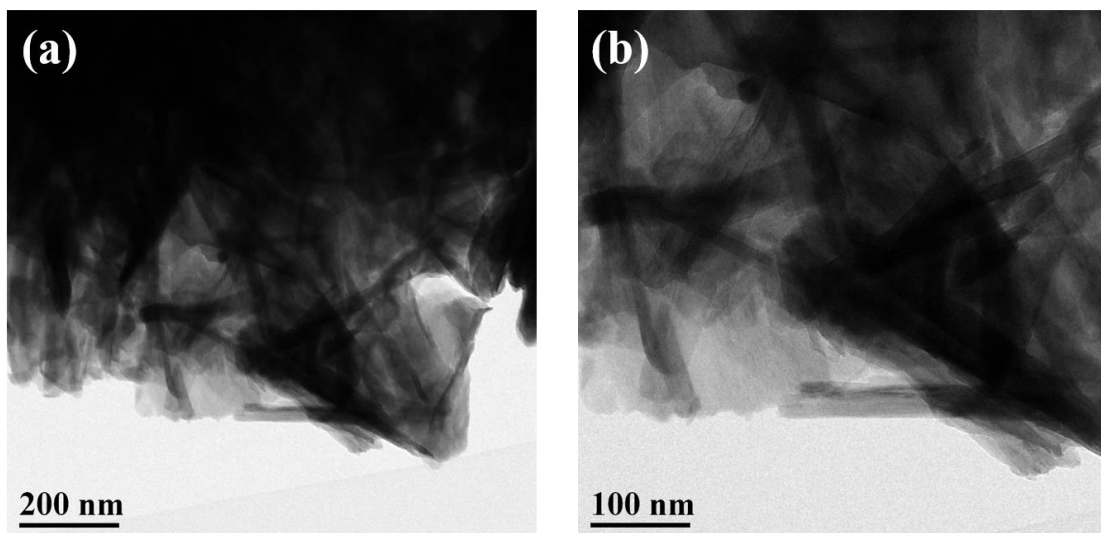

Fig. S4. TEM images of VO<sub>2</sub>.

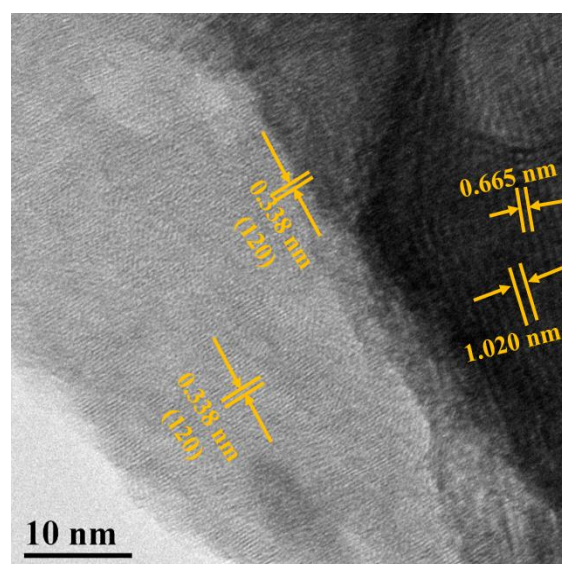

Fig. S5. HR-TEM images of pristine VO<sub>2</sub>.

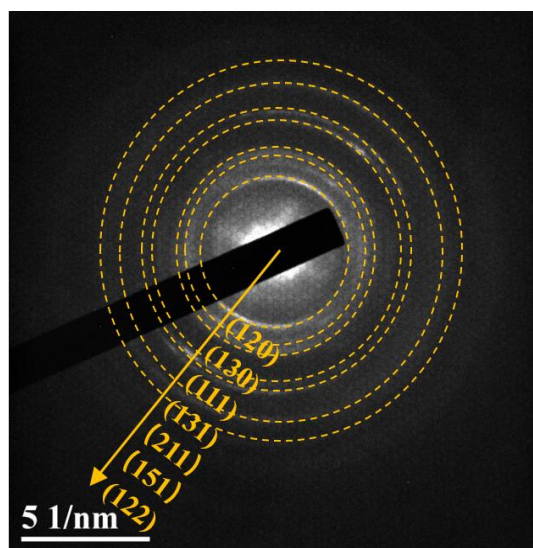

Fig. S6. SAED pattern of VO<sub>2</sub>.

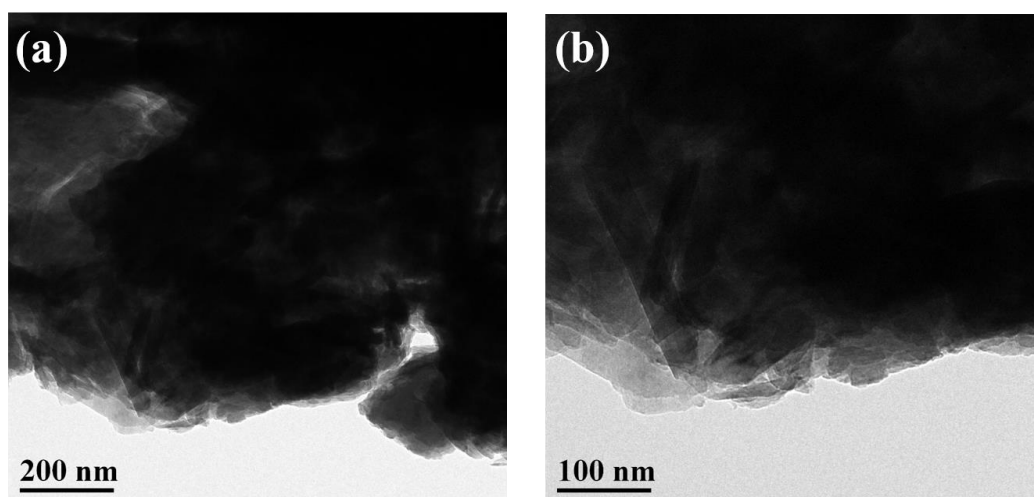

Fig. S7. TEM images of VO<sub>2</sub>-B<sub>0.5</sub>.

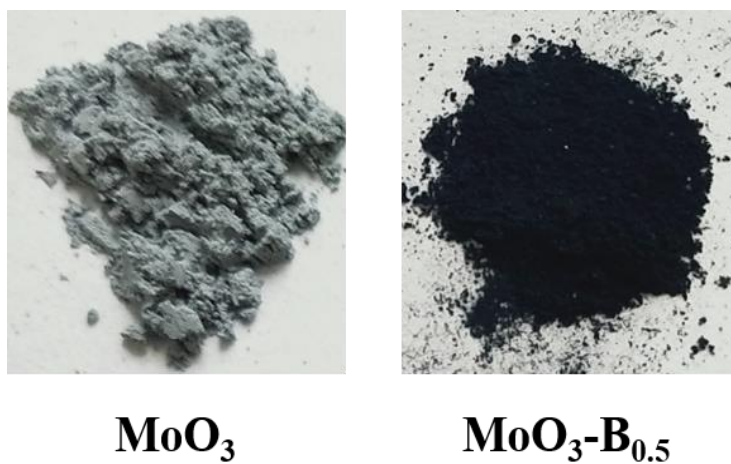

**Fig. S8.** Photographs of the  $\text{MoO}_3$  and  $\text{MoO}_3\text{-B}_{0.5}$  by sodium borohydride grinding treatment.

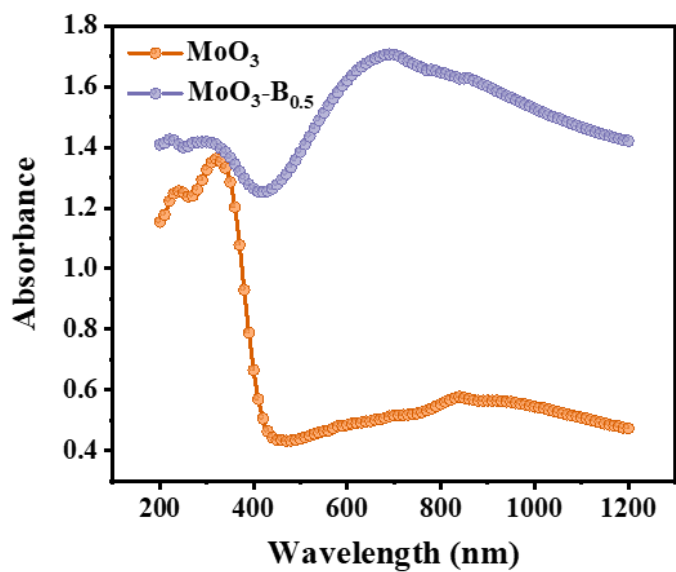

**Fig. S9.** Ultraviolet-visible diffuse reflectance spectroscopy of  $\text{MoO}_3$  and  $\text{MoO}_3\text{-B}_{0.5}$ .

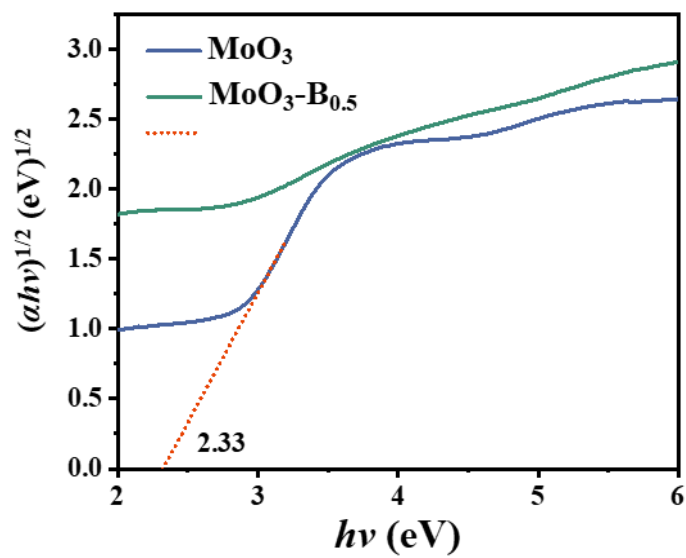

Fig. S10. Tauc's bandgap plot of  $\text{MoO}_3$  and  $\text{MoO}_3\text{-B}_{0.5}$ .

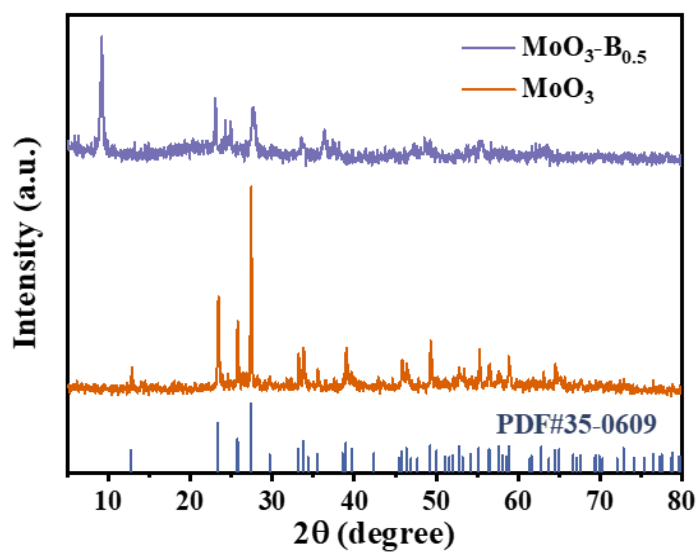

Fig. S11. XRD patterns of  $\text{MoO}_3$  and  $\text{MoO}_3\text{-B}_{0.5}$ .

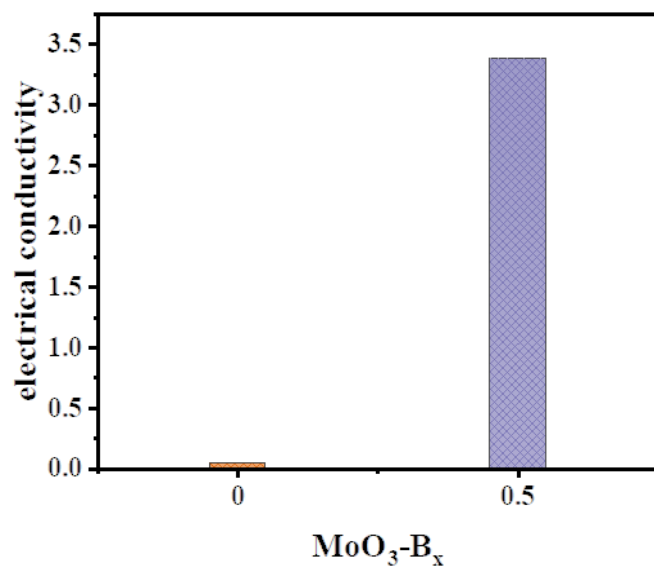

**Fig. S12.** The electrical conductivity of MoO<sub>3</sub> and MoO<sub>3</sub>-B<sub>0.5</sub>.

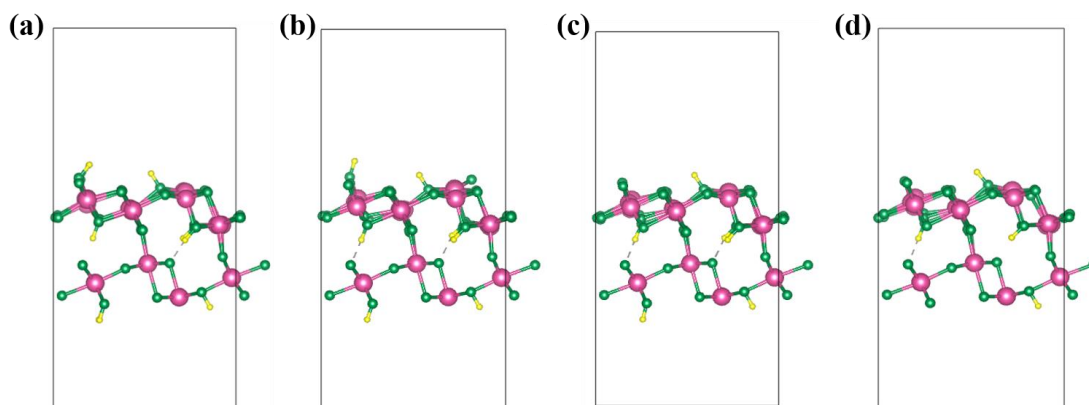

**Fig. S13.** The front views on the supercells of (a) H<sub>9</sub>V<sub>32</sub>O<sub>64</sub> (bulk VO<sub>2</sub>, 14.0% H-doping), (b) H<sub>8</sub>V<sub>32</sub>O<sub>63</sub> (1.56% O-vacancy), (c) H<sub>6</sub>V<sub>32</sub>O<sub>61</sub> (4.69% O-vacancy), (d) H<sub>4</sub>V<sub>32</sub>O<sub>59</sub> (7.81% O-vacancy). The red balls denote V atoms, the green balls denote O atoms, and the yellow balls means H atoms.



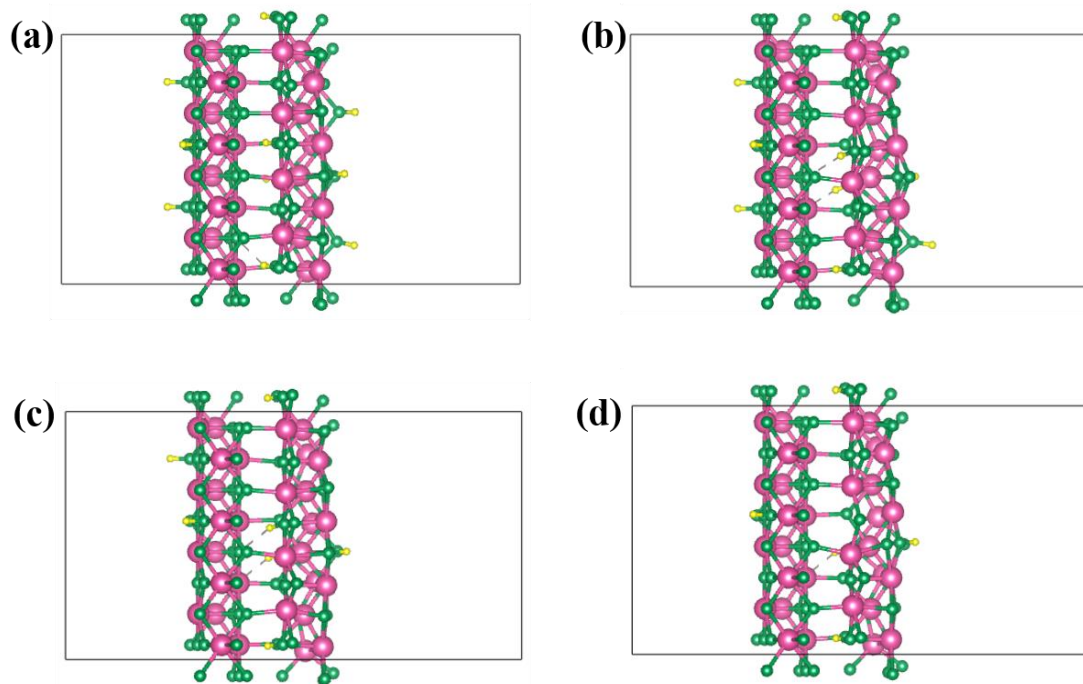

**Fig. S14.** The profile views on the supercells of (a)  $\text{H}_9\text{V}_{32}\text{O}_{64}$  (bulk  $\text{VO}_2$ , 14.0% H-doping), (b)  $\text{H}_8\text{V}_{32}\text{O}_{63}$  (1.56% O-vacancy), (c)  $\text{H}_6\text{V}_{32}\text{O}_{61}$  (4.69% O-vacancy), (d)  $\text{H}_4\text{V}_{32}\text{O}_{59}$  (7.81% O-vacancy). The red balls denote V atoms, the green balls denote O atoms, and the yellow balls means H atoms.

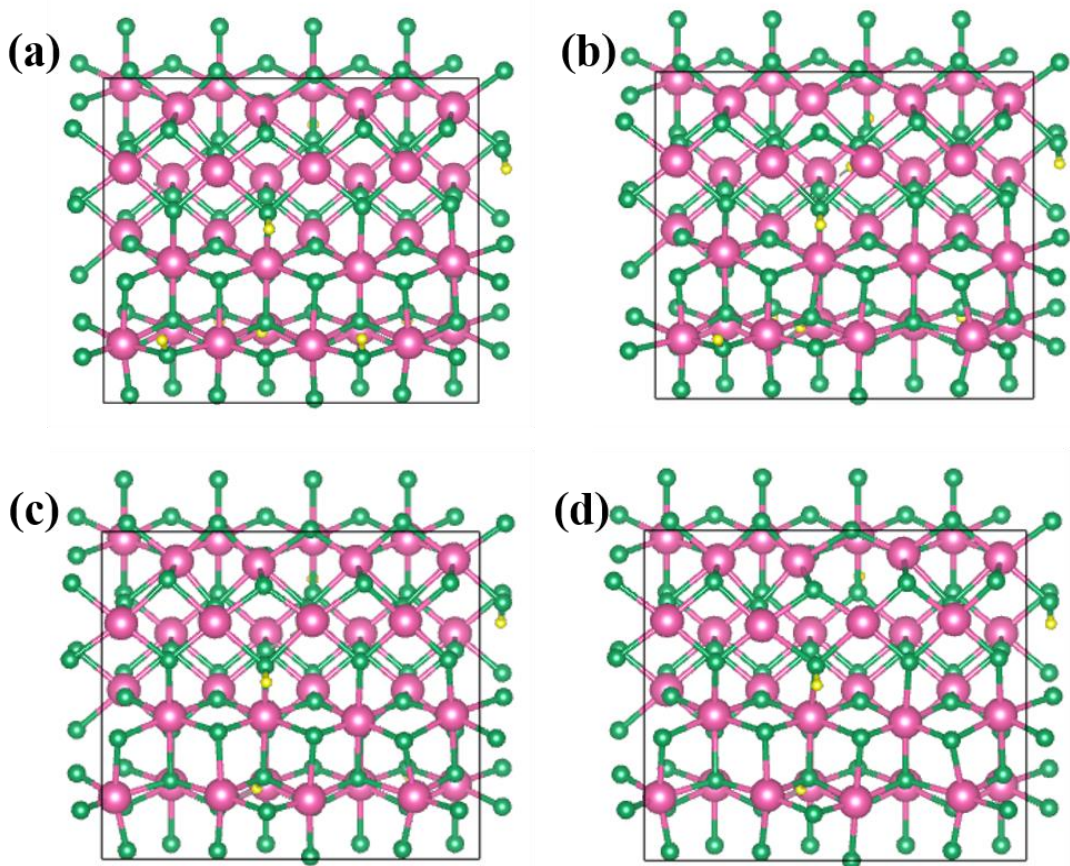

**Fig. S15.** The aerival views on the supercells of (a)  $H_9V_{32}O_{64}$  (bulk  $VO_2$ , 14.0% H-doping), (b)  $H_8V_{32}O_{63}$  (1.56% O-vacancy), (c)  $H_6V_{32}O_{61}$  (4.69% O-vacancy), (d)  $H_4V_{32}O_{59}$  (7.81% O-vacancy). The red balls denote V atoms, the green balls denote O atoms, and the yellow balls means H atoms.

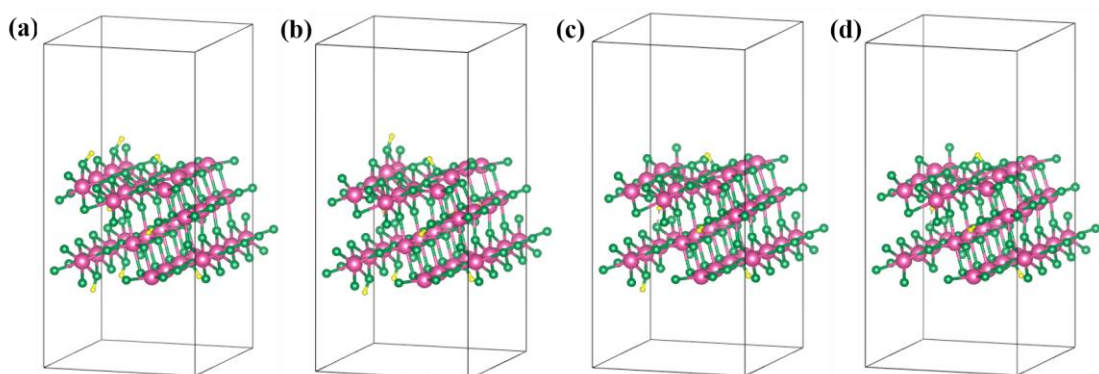

**Fig. S16.** The stereochemical structures of (a)  $H_9V_{32}O_{64}$  (bulk  $VO_2$ , 14.0% H-doping), (b)  $H_8V_{32}O_{63}$  (1.56% O-vacancy), (c)  $H_6V_{32}O_{61}$  (4.69% O-vacancy), (d)  $H_4V_{32}O_{59}$  (7.81% O-vacancy). The red balls denote V atoms, the green balls denote O atoms, and the yellow balls means H atoms.

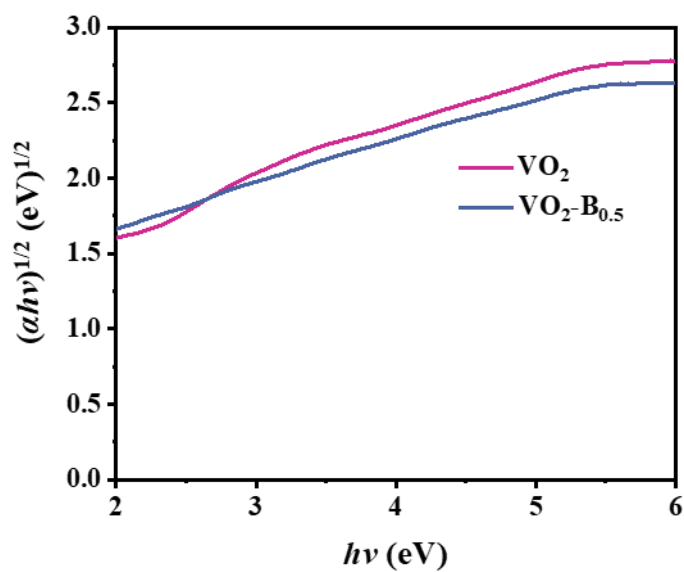

Fig. S17. Tauc's bandgap plot of VO<sub>2</sub> and VO<sub>2</sub>-B<sub>0.5</sub>.

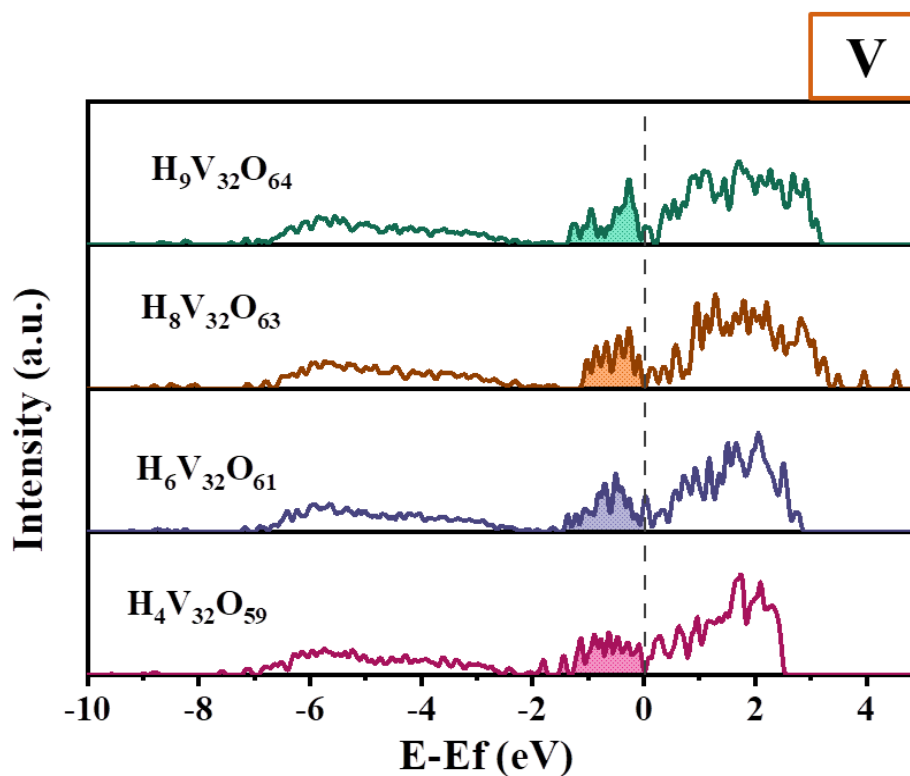

Fig. S18. Simulated density of states (DOS) of V atoms with H<sub>9</sub>V<sub>32</sub>O<sub>64</sub>, H<sub>8</sub>V<sub>32</sub>O<sub>63</sub>, H<sub>6</sub>V<sub>32</sub>O<sub>61</sub> and H<sub>4</sub>V<sub>32</sub>O<sub>59</sub> with different content of Oxygen vacancy in the lattice, shaded areas (S1 = 33.47, S2 = 34.63, S3 = 35.44, S4 = 37.14).

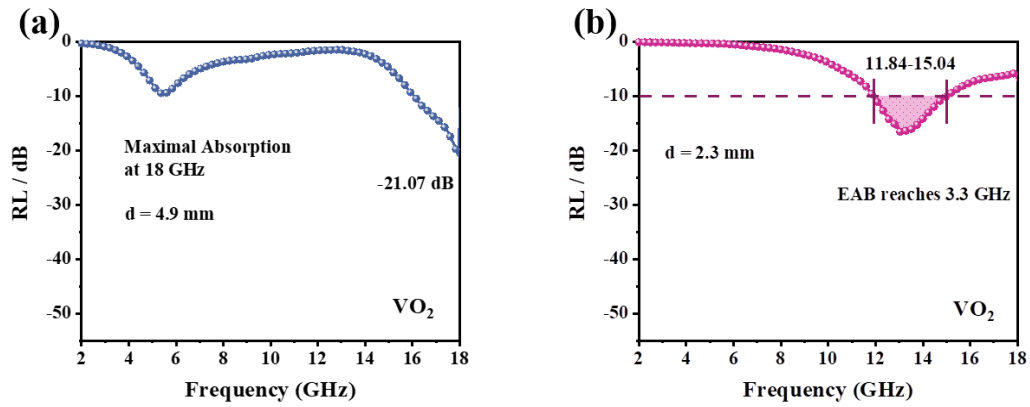

Fig. S19. The reflection loss curves of VO<sub>2</sub> with a sample thickness of (a) 1.9 mm and (b) 2.3 mm.

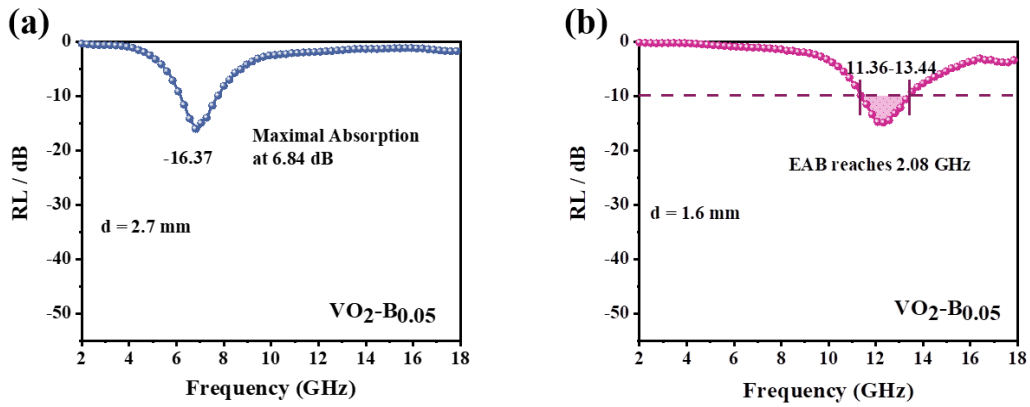

Fig. S20. The reflection loss curves of VO<sub>2</sub>-B<sub>0.05</sub> with a sample thickness of (a) 2.7 mm and (b) 1.6 mm.

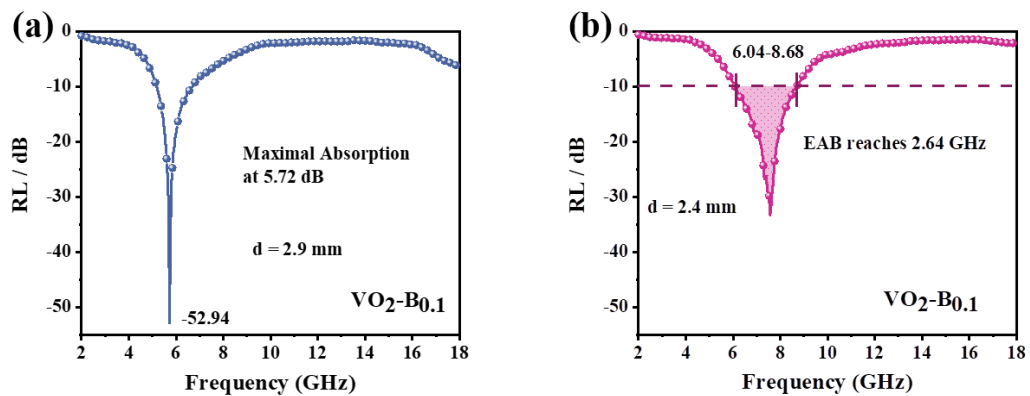

Fig. S21. The reflection loss curves of VO<sub>2</sub>-B<sub>0.1</sub> with a sample thickness of (a) 2.9 mm and (b) 2.4 mm.

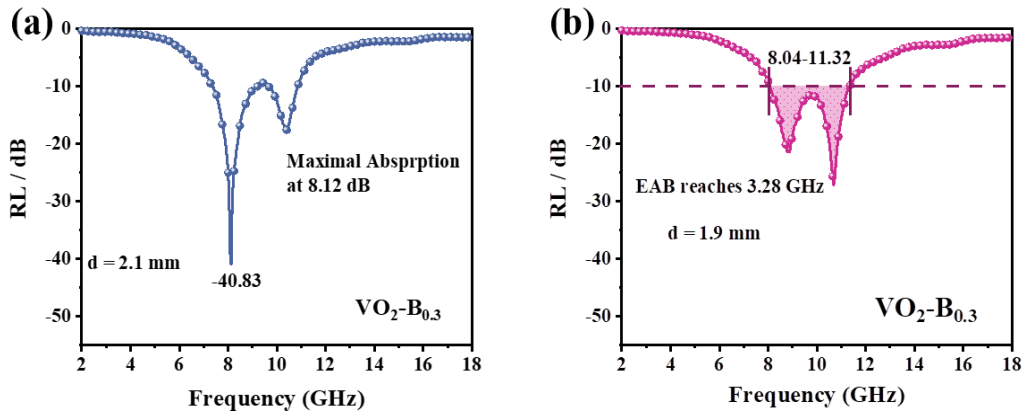

Fig. S22. The reflection loss curves of VO<sub>2</sub>-B<sub>0.3</sub> with a sample thickness of (a) 2.1 mm and (b) 1.9 mm.

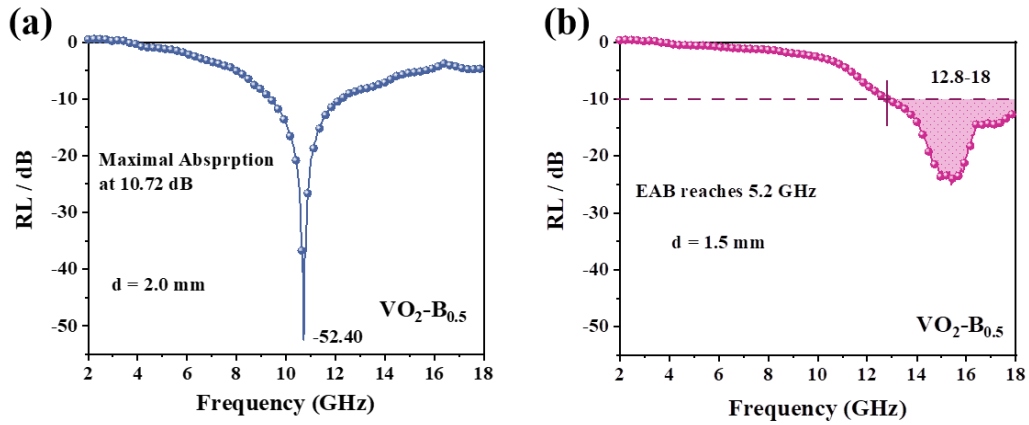

Fig. S23. The reflection loss curves of VO<sub>2</sub>-B<sub>0.5</sub> with a sample thickness of (a) 2.0 mm and (b) 1.5 mm.

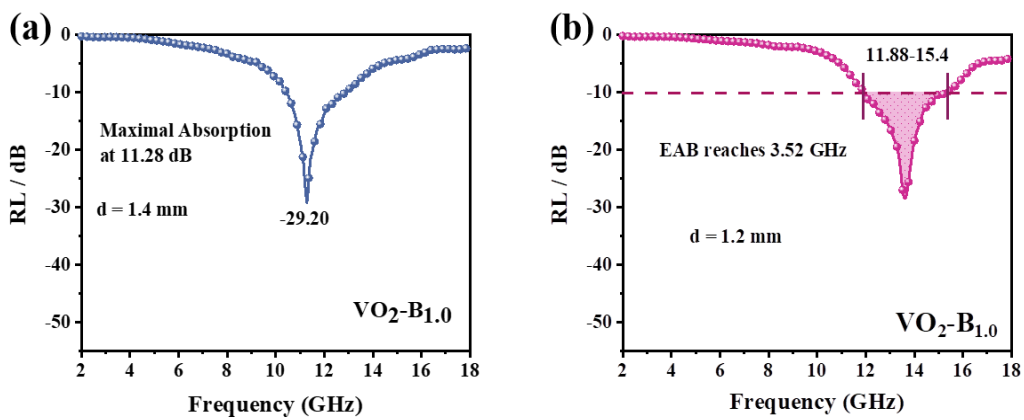

Fig. S24. The reflection loss curves of VO<sub>2</sub>-B<sub>1.0</sub> with a sample thickness of (a) 1.4 mm and (b) 1.2 mm.

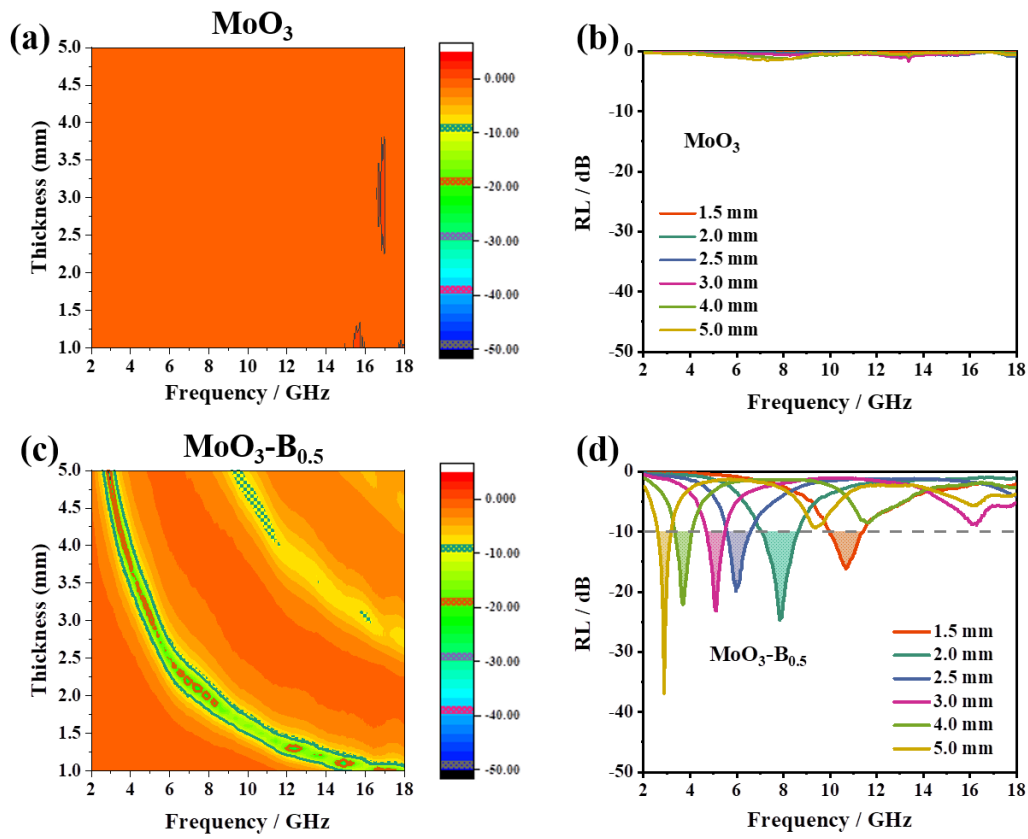

Fig. S25. EMA performance of (a, b)  $\text{MoO}_3$ , (c, d)  $\text{MoO}_3\text{-B}_{0.5}$ .

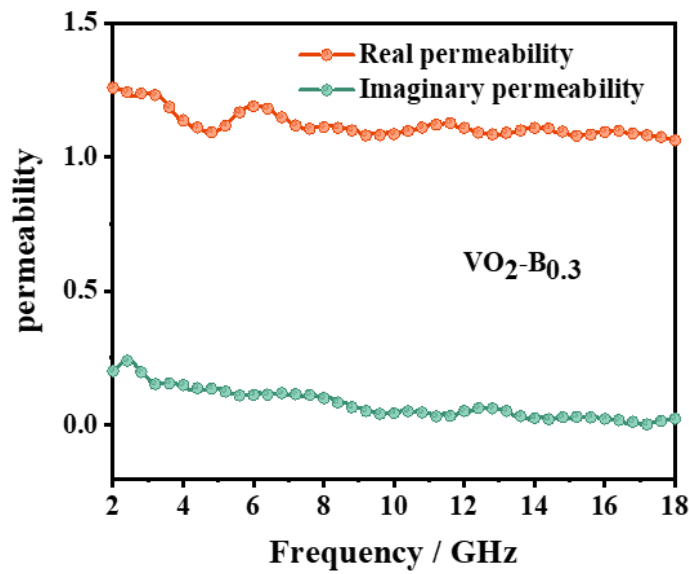

Fig. S26. The real permeability and imaginary permeability of  $\text{VO}_2\text{-B}_x$ .

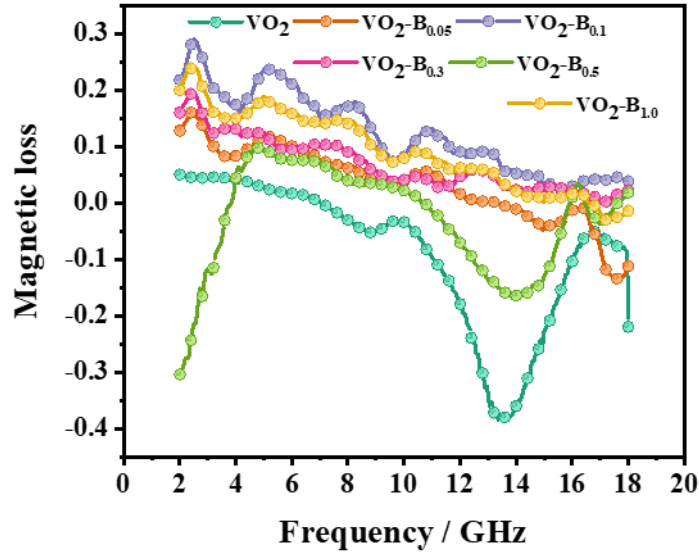

Fig. S27 The magnetic loss of of VO<sub>2</sub> and VO<sub>2</sub>-B<sub>x</sub> (x= 0.05, 0.1, 0.3, 0.5, 1.0).

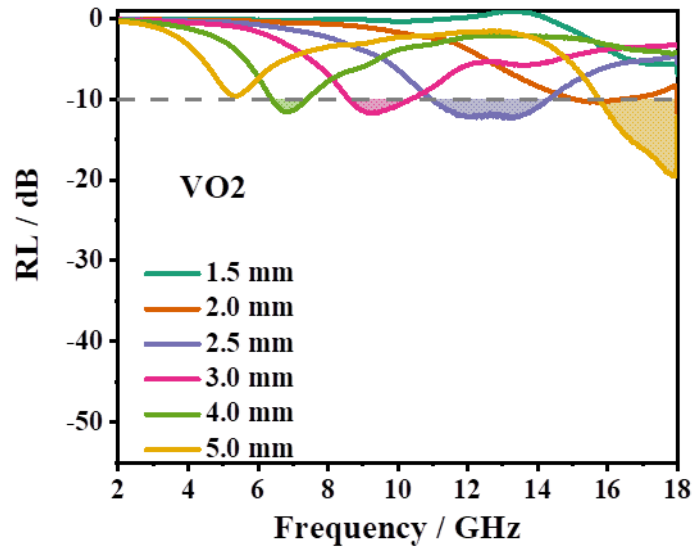

Fig. S28. RL vs. frequency plots of VO<sub>2</sub> (1.5-5.0 mm-thick).

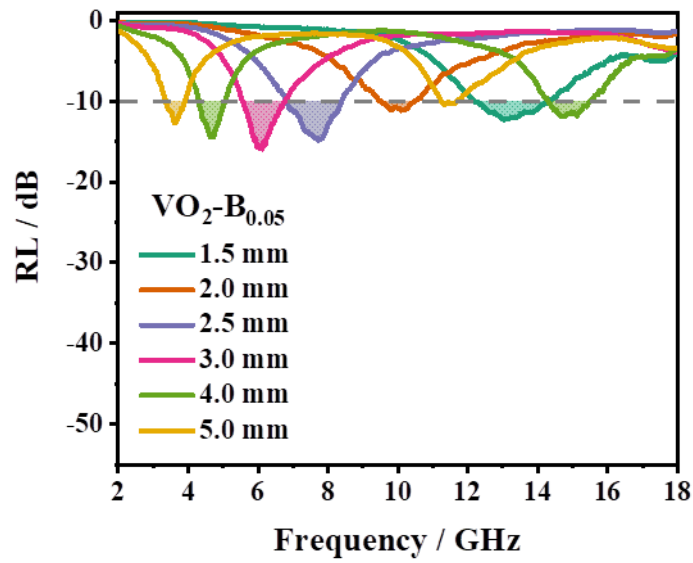

Fig. S29. RL vs. frequency plots of VO<sub>2</sub>-B<sub>0.05</sub> (1.5-5.0 mm-thick).

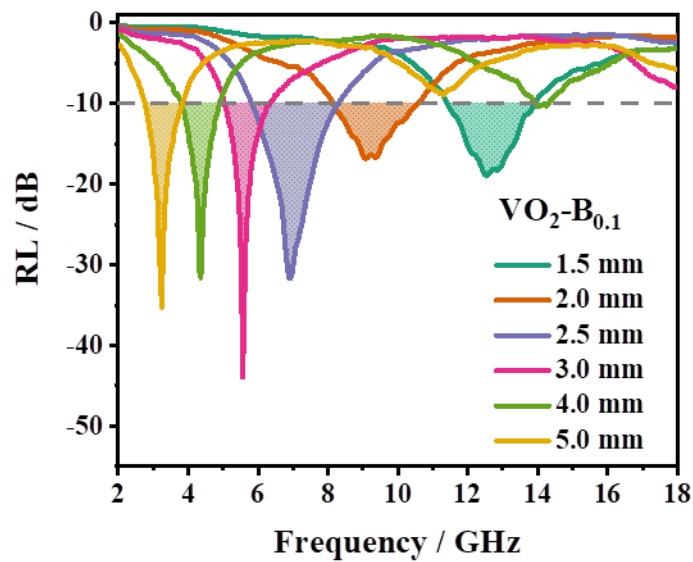

Fig. S30. RL vs. frequency plots of VO<sub>2</sub>-B<sub>0.1</sub> (1.5-5.0 mm-thick).



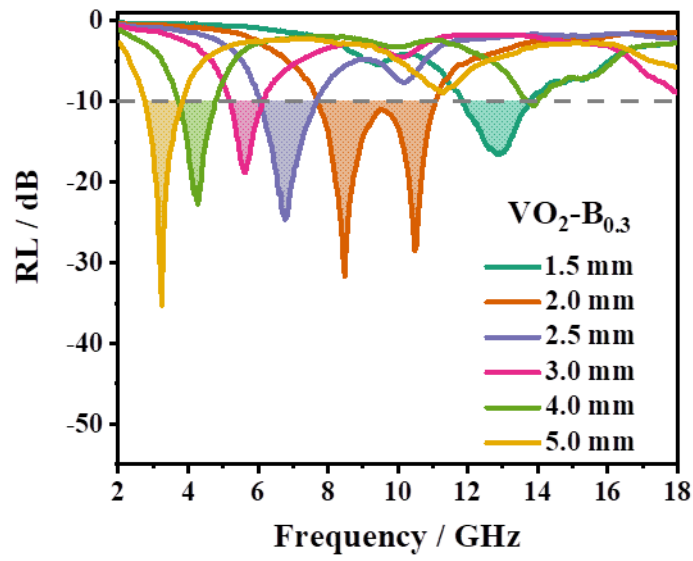

Fig. S31. RL vs. frequency plots of VO<sub>2</sub>-B<sub>0.3</sub> (1.5-5.0 mm-thick).

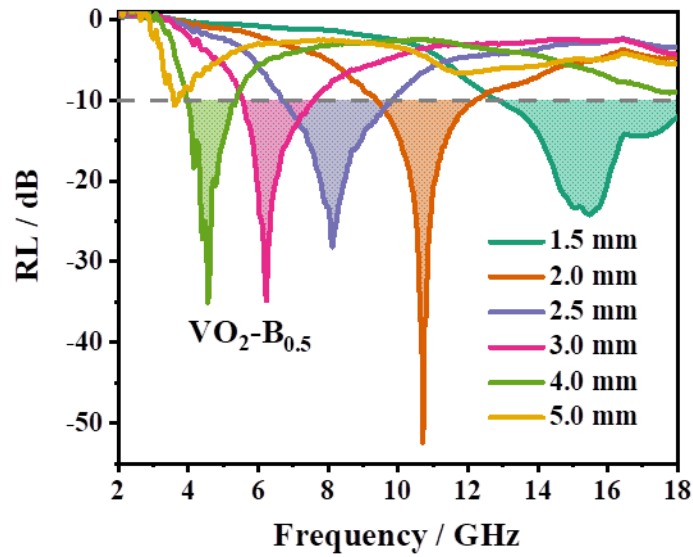

Fig. S32. RL vs. frequency plots of VO<sub>2</sub>-B<sub>0.5</sub> (1.5-5.0 mm-thick).

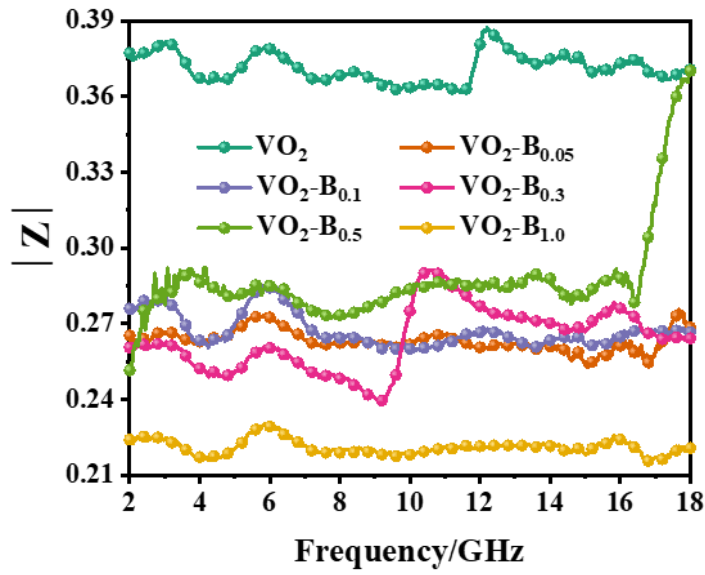

Fig. S33. The impedance values of  $\text{VO}_2\text{-B}_x$  ( $x = 0.05, 0.1, 0.3, 0.5, 1.0$ ).

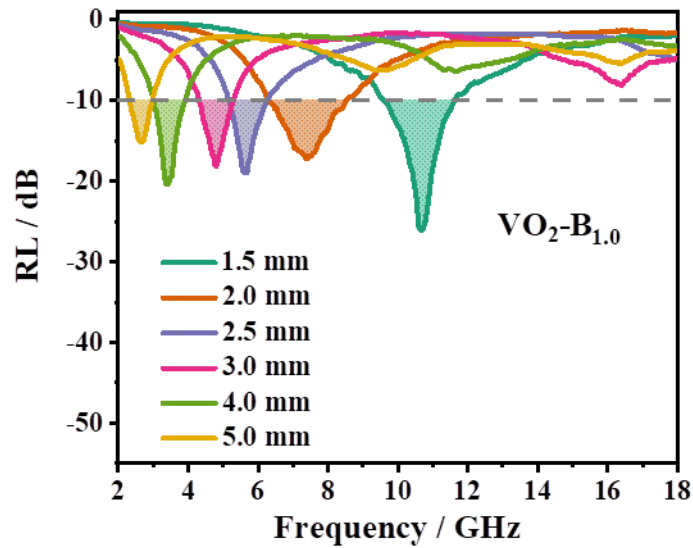

Fig. S34. RL vs. frequency plots of  $\text{VO}_2\text{-B}_{1.0}$  (1.5-5.0 mm-thick).
